# Supplementary material for: Synthesis, Characterization and Sorption Properties of Biochar, Chitosan and ZnO-Based Binary Composites towards a Cationic Dye
Source: MDPI journal article supplement (doi:10.3390/su142114571), 2022-11-05
Supplement: s1 [file s1]

**Table S1.** Independent parameters and their corresponding levels for percentage removal (% R) for BC

| Run | X <sub>1</sub> : Time<br>(minutes) | X <sub>2</sub> : Concentration<br>(mg/L) | X <sub>3</sub> : pH | Removal<br>% |
|-----|------------------------------------|------------------------------------------|---------------------|--------------|
| 1   | 10                                 | 10                                       | 2                   | 37.6         |
| 2   | 10                                 | 60                                       | 10                  | 58.3         |
| 3   | 90                                 | 35                                       | 9                   | 93.2         |
| 4   | 90                                 | 35                                       | 9                   | 92.9         |
| 5   | 120                                | 60                                       | 2                   | 26.1         |
| 6   | 65                                 | 35                                       | 6                   | 77.5         |
| 7   | 10                                 | 60                                       | 2                   | 23.2         |
| 8   | 120                                | 60                                       | 10                  | 80.8         |
| 9   | 120                                | 10                                       | 10                  | 98.5         |
| 10  | 65                                 | 35                                       | 6                   | 78.1         |
| 11  | 10                                 | 10                                       | 10                  | 79.2         |
| 12  | 120                                | 10                                       | 2                   | 43.1         |
| 13  | 157.5                              | 35                                       | 6                   | 84.2         |
| 14  | 7.5                                | 35                                       | 6                   | 64.6         |

|    |    |     |      |      |
|----|----|-----|------|------|
| 15 | 65 | 35  | 6    | 76.9 |
| 16 | 65 | 35  | 0.7  | 19.6 |
| 17 | 65 | 35  | 12.7 | 70.6 |
| 18 | 65 | 75  | 6    | 54.3 |
| 19 | 65 | 35  | 6    | 77.9 |
| 20 | 65 | 9.5 | 6    | 87.4 |

**Table S2.** The ANOVA analysis of variance quadratic model for removal of the dye

| Source          | F-value | p-value  |             |
|-----------------|---------|----------|-------------|
| Model           | 249.38  | < 0.0001 | significant |
| A-Time          | 115.40  | < 0.0001 |             |
| B-Concentration | 182.64  | < 0.0001 |             |
| C-pH            | 1396.93 | < 0.0001 |             |
| AB              | 0.0089  | 0.9266   |             |
| AC              | 30.71   | 0.0002   |             |
| BC              | 1.29    | 0.2834   |             |
| A <sup>2</sup>  | 12.98   | 0.0048   |             |
| B <sup>2</sup>  | 17.45   | 0.0019   |             |
| C <sup>2</sup>  | 525.87  | < 0.0001 |             |

| Residual    |       |        |             |
|-------------|-------|--------|-------------|
| Lack of Fit | 37.32 | 0.0018 | significant |
